# Supplementary material for: Phototransformation of Graphene Oxide on the Removal of Sulfamethazine in a Water Environment
Source: MDPI journal article supplement (doi:10.3390/nano11082134), 2021-08-22
Supplement: s1 [file s1]

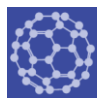

## Article

# Phototransformation of Graphene Oxide on the Removal of Sulfamethazine in a Water Environment

Fei-Fei Liu <sup>1,\*</sup>, Meng-Ru Li <sup>1</sup>, Su-Chun Wang <sup>1</sup>, Yu-Xue Zhang <sup>1</sup>, Guang-Zhou Liu <sup>1</sup> and Jin-Lin Fan <sup>2</sup>

<sup>1</sup> Institute of Marine Science and Technology, Shandong University, Qingdao 266237, China; limr666@163.com (M.-R.L.); suchunw@163.com (S.-C.W.); zhangyuxue@mail.sdu.edu.cn (Y.-X.Z.); liuguangzhou@sdu.edu.cn (G.-Z.L.)

<sup>2</sup> Department of Science and Technology Management, Shandong University, Jinan 250100, China; fanjinlin@sdu.edu.cn

\* Correspondence: liufeifei@sdu.edu.cn

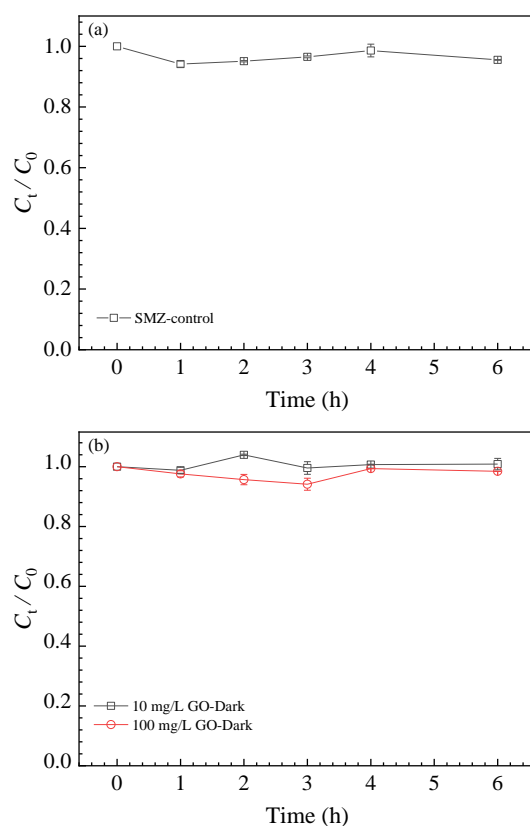

**Figure S1.** Photolysis kinetics of SMZ (5  $\mu$ M) under UV light without GO (a) and the adsorption of SMZ (5  $\mu$ M) by GO (10 and 100 mg/L) in the dark within 6 h (b).

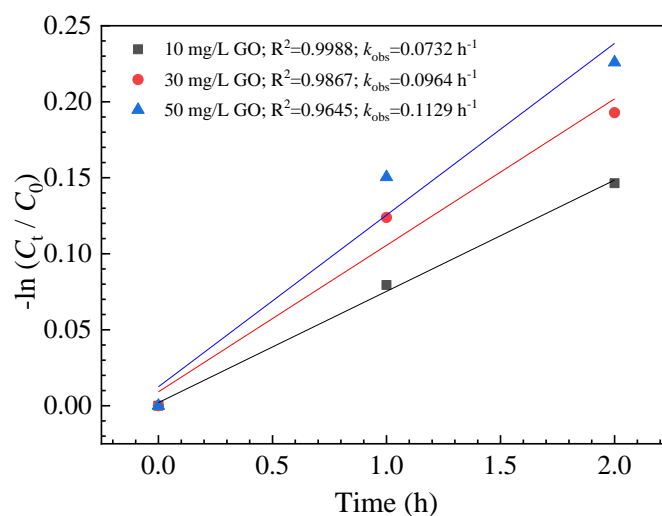

**Figure S2.** Pseudo first-order fitting results for SMZ degradation kinetics under various GO concentrations (10-50 mg/L).

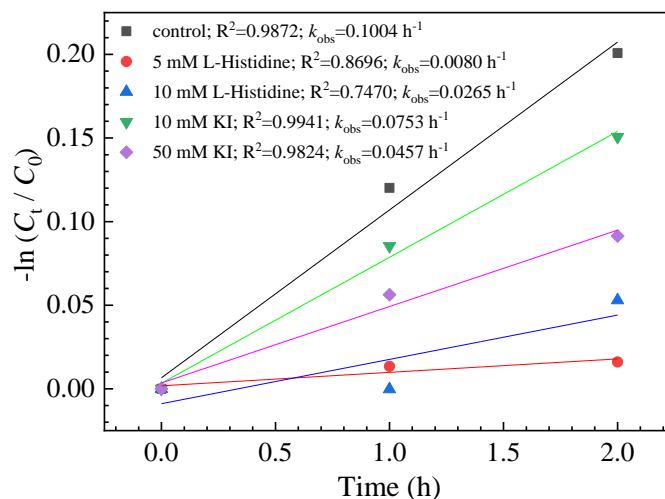

**Figure S3.** Pseudo first-order kinetics fitting for kinetics of SMZ degradation with L-histidine and KI.

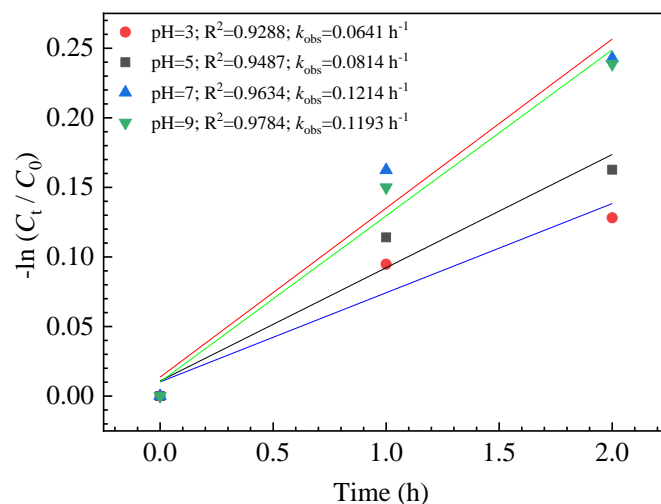

**Figure S4.** Pseudo first-order kinetics fitting for kinetics of SMZ degradation at pH 3.0-9.0.

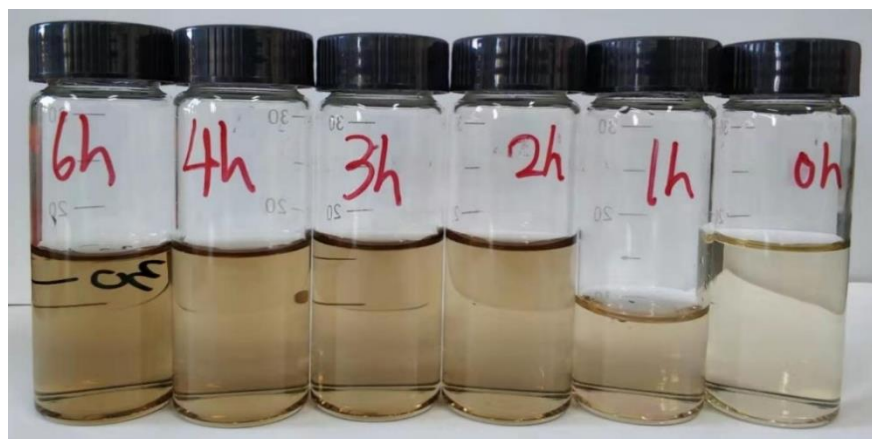

**Figure S5.** Changes in the color of GO under UV light as a function of irradiation time.

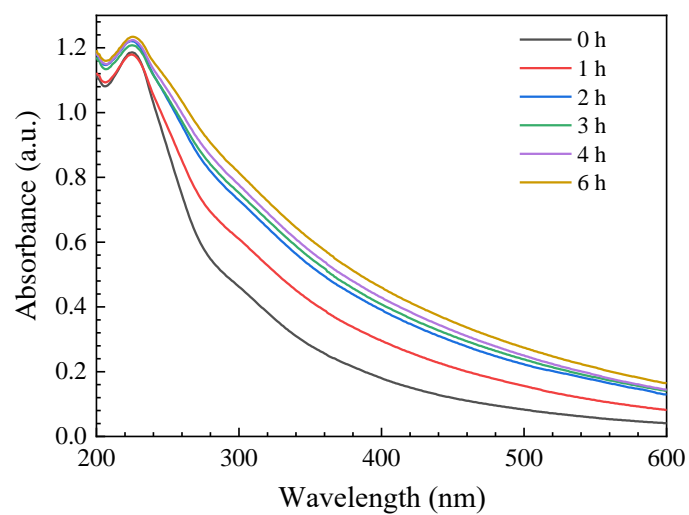

**Figure S6.** Variation of GO absorbance with time under light.

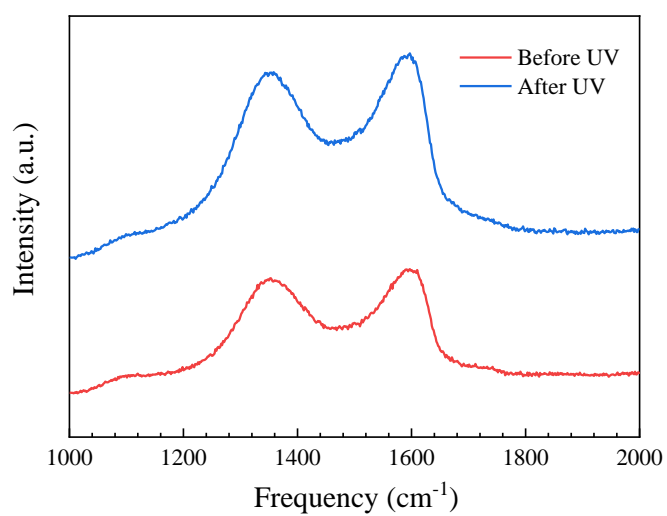

**Figure S7.** Raman spectra of GO before and after UV illumination.
